# Supplementary material for: HIV Testing and Counseling at U.S. Substance Use Treatment Facilities: A Missed Opportunity for Early Identification
Source: Atypon-hosted journal article supplement (doi:10.1176/appi.ps.202000524), 2021-06-15
Supplement: appi.ps.202000524.ds001.pdf [file appi.ps.202000524.ds001.pdf]

**eTable 1: HIV Testing/Counseling at substance use treatment facilities by State in 2018**

| State/District       | Newly Diagnosed HIV Cases in State per 100,000 (2017)(13) | Total Facilities in State | Facilities offering HIV Testing |           | Facilities offering HIV Counseling |           | Facilities offering both HIV Testing and Counseling |           | Facilities offering neither HIV testing nor counseling |           |
|----------------------|-----------------------------------------------------------|---------------------------|---------------------------------|-----------|------------------------------------|-----------|-----------------------------------------------------|-----------|--------------------------------------------------------|-----------|
|                      |                                                           |                           | N                               | %         | N                                  | %         | N                                                   | %         | N                                                      | %         |
| <b>Total N</b>       | 11.8                                                      | 14691                     | 4258                            | 29.0      | 7785                               | 53.0      | 3441                                                | 23.4      | 6089                                                   | 41.4      |
| <b>Range</b>         | 1.7-45.3                                                  | 24-1502                   | 7-441                           | 8.97-62.8 | 15-852                             | 19.2-83.3 | 4-367                                               | 5.13-54.2 | 4-576                                                  | 16.3-76.9 |
| Alabama              | 13.4                                                      | 132                       | 49                              | 37.1      | 103                                | 78.0      | 43                                                  | 32.6      | 23                                                     | 17.4      |
| Alaska               | 3.9                                                       | 91                        | 27                              | 29.7      | 68                                 | 74.7      | 24                                                  | 26.4      | 20                                                     | 22.0      |
| Arizona              | 10.3                                                      | 407                       | 139                             | 34.2      | 145                                | 35.6      | 89                                                  | 21.9      | 212                                                    | 52.1      |
| Arkansas             | 9.6                                                       | 144                       | 18                              | 12.5      | 79                                 | 54.9      | 13                                                  | 9.0       | 60                                                     | 41.7      |
| California           | 12.4                                                      | 1502                      | 441                             | 29.4      | 852                                | 56.7      | 367                                                 | 24.4      | 576                                                    | 38.3      |
| Colorado             | 7.8                                                       | 404                       | 52                              | 12.9      | 95                                 | 23.5      | 26                                                  | 6.4       | 283                                                    | 70.0      |
| Connecticut          | 7.7                                                       | 220                       | 71                              | 32.3      | 99                                 | 45.0      | 65                                                  | 29.5      | 115                                                    | 52.3      |
| Delaware             | 13.3                                                      | 40                        | 17                              | 42.5      | 19                                 | 47.5      | 15                                                  | 37.5      | 19                                                     | 47.5      |
| District of Columbia | 45.3                                                      | 24                        | 13                              | 54.2      | 20                                 | 83.3      | 13                                                  | 54.2      | 4                                                      | 16.7      |
| Florida              | 21.8                                                      | 726                       | 336                             | 46.3      | 505                                | 69.6      | 312                                                 | 43.0      | 197                                                    | 27.1      |
| Georgia              | 24.9                                                      | 332                       | 151                             | 45.5      | 202                                | 60.8      | 134                                                 | 40.4      | 113                                                    | 34.0      |
| Hawaii               | 5.5                                                       | 168                       | 16                              | 9.5       | 67                                 | 39.9      | 12                                                  | 7.1       | 97                                                     | 57.7      |
| Idaho                | 2.7                                                       | 133                       | 16                              | 12.0      | 36                                 | 27.1      | 13                                                  | 9.8       | 94                                                     | 70.7      |
| Illinois             | 10.7                                                      | 679                       | 147                             | 21.6      | 394                                | 58.0      | 119                                                 | 17.5      | 257                                                    | 37.8      |
| Indiana              | 7.8                                                       | 368                       | 84                              | 22.8      | 143                                | 38.9      | 58                                                  | 15.8      | 199                                                    | 54.1      |
| Iowa                 | 4.0                                                       | 167                       | 23                              | 13.8      | 70                                 | 41.9      | 18                                                  | 10.8      | 92                                                     | 55.1      |
| Kansas               | 4.1                                                       | 179                       | 25                              | 14.0      | 101                                | 56.4      | 20                                                  | 11.2      | 73                                                     | 40.8      |
| Kentucky             | 8.2                                                       | 418                       | 101                             | 24.2      | 184                                | 44.0      | 77                                                  | 18.4      | 210                                                    | 50.2      |
| Louisiana            | 21.5                                                      | 145                       | 91                              | 62.8      | 87                                 | 60.0      | 65                                                  | 44.8      | 32                                                     | 22.1      |
| Maine                | 2.2                                                       | 181                       | 29                              | 16.0      | 60                                 | 33.1      | 24                                                  | 13.3      | 116                                                    | 64.1      |
| Maryland             | 17.0                                                      | 413                       | 135                             | 32.7      | 249                                | 60.3      | 114                                                 | 27.6      | 143                                                    | 34.6      |
| Massachusetts        | 8.8                                                       | 414                       | 182                             | 44.0      | 311                                | 75.1      | 156                                                 | 37.7      | 77                                                     | 18.6      |
| Michigan             | 7.8                                                       | 465                       | 84                              | 18.1      | 173                                | 37.2      | 68                                                  | 14.6      | 276                                                    | 59.4      |
| Minnesota            | 5.0                                                       | 378                       | 49                              | 13.0      | 257                                | 68.0      | 46                                                  | 12.2      | 118                                                    | 31.2      |
| Mississippi          | 14.3                                                      | 98                        | 33                              | 33.7      | 77                                 | 78.6      | 28                                                  | 28.6      | 16                                                     | 16.3      |
| Missouri             | 8.3                                                       | 273                       | 53                              | 19.4      | 135                                | 49.5      | 40                                                  | 14.7      | 125                                                    | 45.8      |
| Montana              | 2.9                                                       | 72                        | 32                              | 44.4      | 41                                 | 56.9      | 28                                                  | 38.9      | 27                                                     | 37.5      |
| Nebraska             | 4.6                                                       | 124                       | 21                              | 16.9      | 38                                 | 30.6      | 16                                                  | 12.9      | 81                                                     | 65.3      |
| Nevada               | 16.6                                                      | 81                        | 48                              | 59.3      | 43                                 | 53.1      | 35                                                  | 43.2      | 25                                                     | 30.9      |
| New Hampshire        | 2.4                                                       | 72                        | 19                              | 26.4      | 47                                 | 65.3      | 17                                                  | 23.6      | 23                                                     | 31.9      |
| New Jersey           | 12.6                                                      | 369                       | 108                             | 29.3      | 209                                | 56.6      | 92                                                  | 24.9      | 144                                                    | 39.0      |
| New Mexico           | 6.7                                                       | 140                       | 31                              | 22.1      | 51                                 | 36.4      | 23                                                  | 16.4      | 81                                                     | 57.9      |
| New York             | 14.0                                                      | 898                       | 374                             | 41.6      | 666                                | 74.2      | 335                                                 | 37.3      | 193                                                    | 21.5      |
| North Carolina       | 12.7                                                      | 513                       | 159                             | 31.0      | 224                                | 43.7      | 116                                                 | 22.6      | 246                                                    | 48.0      |
| North Dakota         | 4.9                                                       | 78                        | 7                               | 9.0       | 15                                 | 19.2      | 4                                                   | 5.1       | 60                                                     | 76.9      |
| Ohio                 | 8.4                                                       | 464                       | 125                             | 26.9      | 191                                | 41.2      | 80                                                  | 17.2      | 228                                                    | 49.1      |
| Oklahoma             | 7.6                                                       | 200                       | 42                              | 21.0      | 134                                | 67.0      | 38                                                  | 19.0      | 62                                                     | 31.0      |
| Oregon               | 4.9                                                       | 229                       | 47                              | 20.5      | 113                                | 49.3      | 37                                                  | 16.2      | 106                                                    | 46.3      |
| Pennsylvania         | 8.6                                                       | 578                       | 165                             | 28.5      | 286                                | 49.5      | 134                                                 | 23.2      | 261                                                    | 45.2      |
| Rhode Island         | 8.0                                                       | 56                        | 23                              | 41.1      | 38                                 | 67.9      | 19                                                  | 33.9      | 14                                                     | 25.0      |
| South Carolina       | 14.2                                                      | 114                       | 62                              | 54.4      | 71                                 | 62.3      | 50                                                  | 43.9      | 31                                                     | 27.2      |
| South Dakota         | 4.5                                                       | 59                        | 13                              | 22.0      | 30                                 | 50.8      | 10                                                  | 16.9      | 26                                                     | 44.1      |
| Tennessee            | 10.8                                                      | 221                       | 81                              | 36.7      | 125                                | 56.6      | 73                                                  | 33.0      | 88                                                     | 39.8      |
| Texas                | 15.4                                                      | 502                       | 232                             | 46.2      | 328                                | 65.3      | 181                                                 | 36.1      | 123                                                    | 24.5      |

|               |      |     |    |      |     |      |    |      |     |      |
|---------------|------|-----|----|------|-----|------|----|------|-----|------|
| Utah          | 3.7  | 269 | 50 | 18.6 | 62  | 23.0 | 21 | 7.8  | 178 | 66.2 |
| Vermont       | 3.2  | 46  | 16 | 34.8 | 33  | 71.7 | 11 | 23.9 | 8   | 17.4 |
| Virginia      | 10.3 | 231 | 61 | 26.4 | 107 | 46.3 | 46 | 19.9 | 109 | 47.2 |
| Washington    | 5.9  | 445 | 56 | 12.6 | 246 | 55.3 | 50 | 11.2 | 193 | 43.4 |
| West Virginia | 4.2  | 268 | 60 | 22.4 | 76  | 28.4 | 33 | 12.3 | 165 | 61.6 |
| Wisconsin     | 4.5  | 108 | 31 | 28.7 | 50  | 46.3 | 21 | 19.4 | 48  | 44.4 |
| Wyoming       | 1.7  | 53  | 13 | 24.5 | 30  | 56.6 | 12 | 22.6 | 22  | 41.5 |
